# Supplementary material for: Simple and Efficient Synthesis of Ruthenium(III) PEDOT:PSS Complexes for High-Performance Stretchable and Transparent Supercapacitors
Source: MDPI journal article supplement (doi:10.3390/nano14100866), 2024-05-16
Supplement: s1 [file s1]

## **Electronic Supplementary Materials**

# **Simple and Efficient Synthesis of Ruthenium(III) PEDOT:PSS Complexes for High-performance Stretchable and Transparent Supercapacitors**

**Guiming Liu <sup>1</sup>, Zhao Huang <sup>1</sup>, Jiujie Xu <sup>1</sup>, Bowen Zhang <sup>2,\*</sup>, Tiesong Lin <sup>1,\*</sup>, Peng He <sup>1,\*</sup>**

<sup>1</sup> State Key Laboratory of Precision Welding & Joining of Materials and Structures, Harbin Institute of

Technology, Harbin 150001, China; liu.guiming@outlook.com (G.L.);

huangzhaohit@outlook.com (Z.H.); 20b909121@stu.hit.edu.cn (J.X.)

<sup>2</sup> School of Electrical Engineering, Tiangong University, Tianjin 300350, China;

bowenzhang@tju.edu.cn

\* Correspondence: hitjoining@hit.edu.cn (T.L.); hithepeng@hit.edu.cn (P.H.)

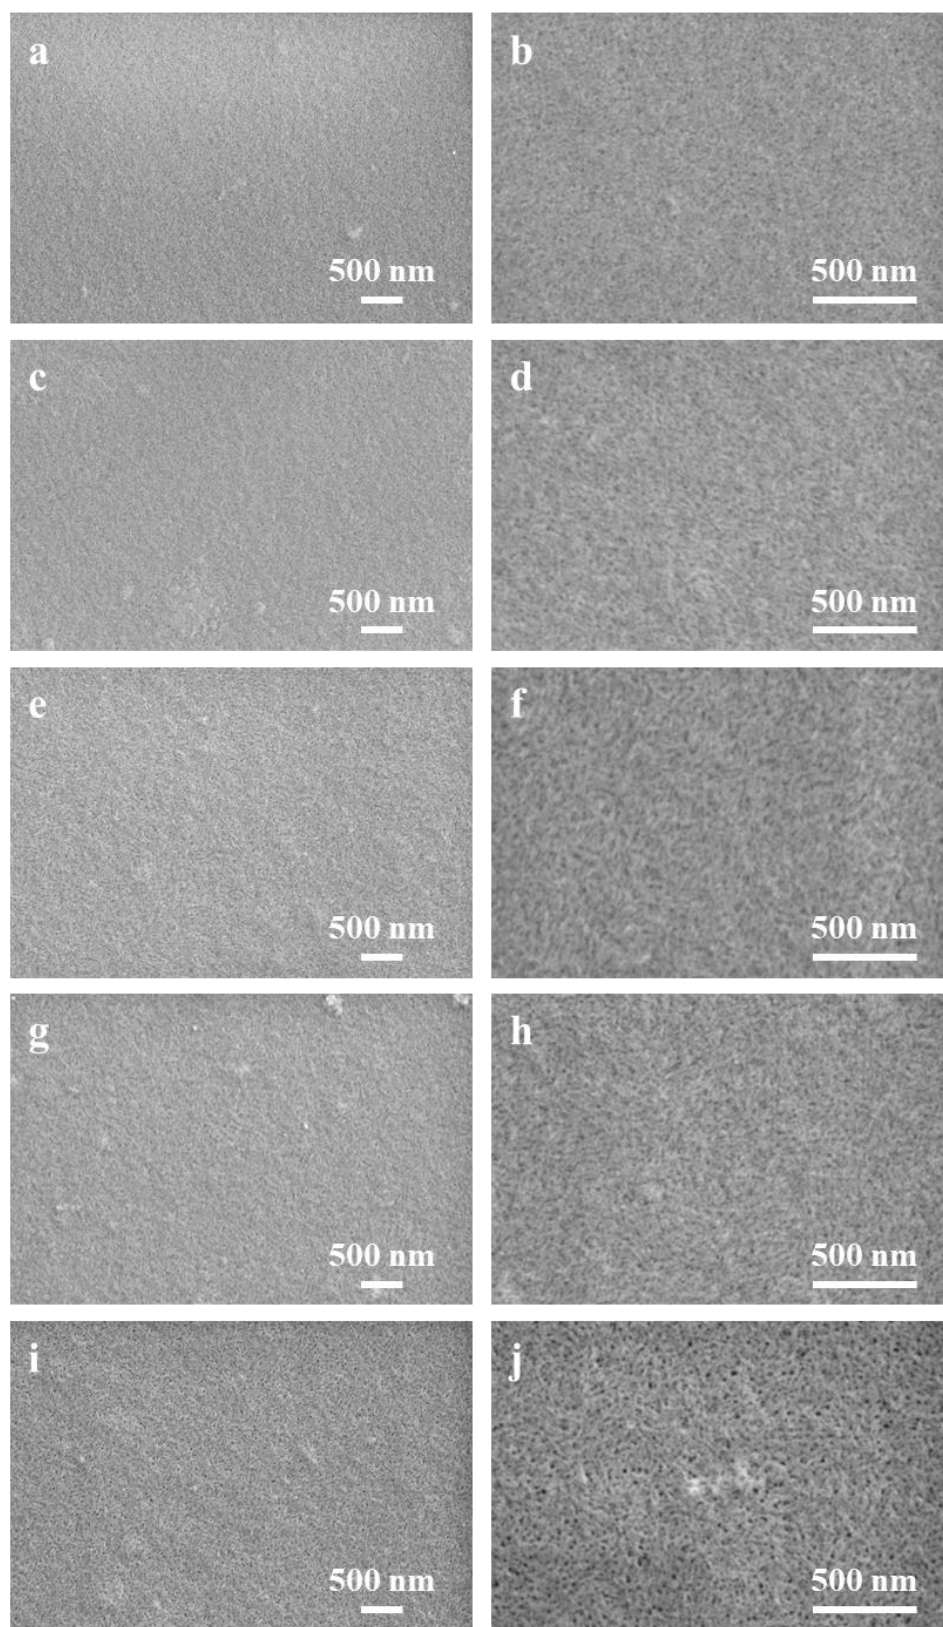

**Figure S1.** SEM images of the PEDOT:PSS film and Ru(III) PEDOT:PSS complexes films with different dipping time. (a) and (b) PEDOT:PSS film. (c) and (d) Dipping 10 s. (e) and (f) Dipping 20 s. (g) and (h) Dipping 30 s. (i) and (j) Dipping 60 s.

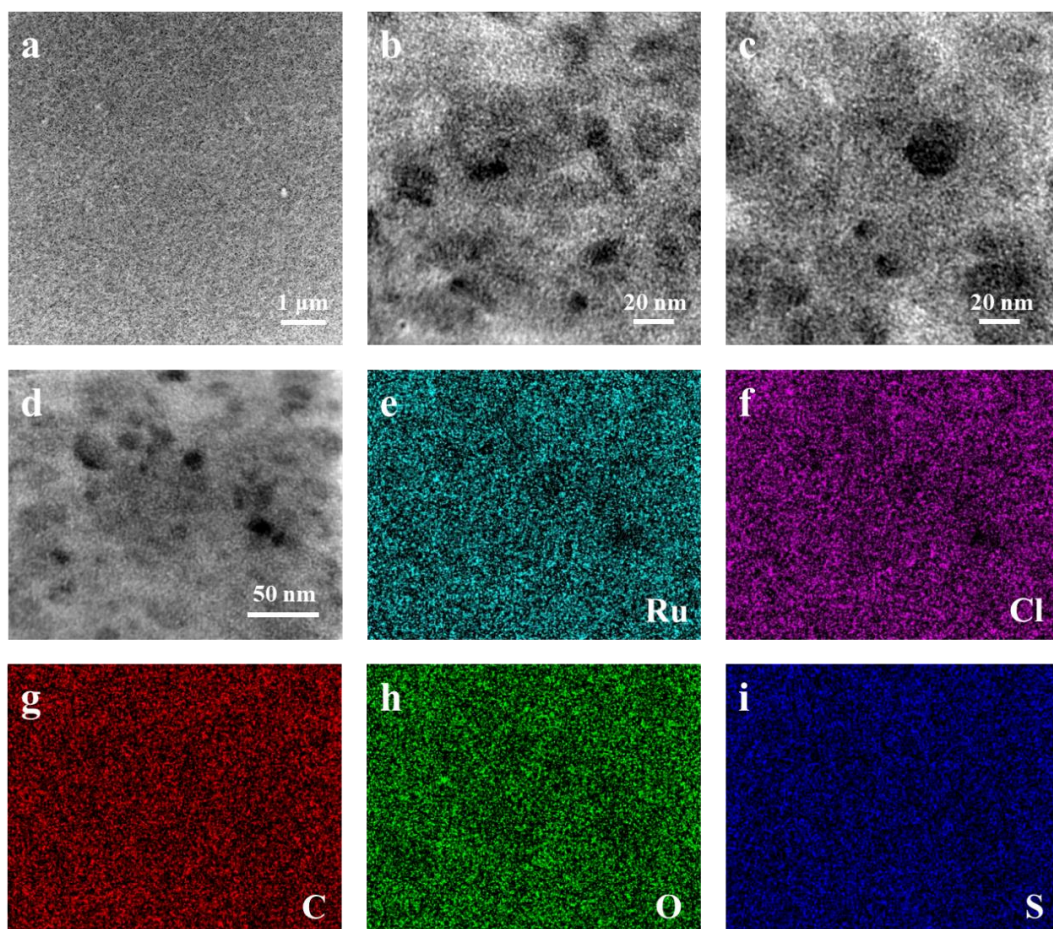

**Figure S2.** (a) TEM and (b, c) HRTEM images of Ru(III) PEDOT:PSS complexes film. (d) HAADF image of Ru(III) PEDOT:PSS complexes and corresponding element mappings of (e) Ru, (f) Cl, (g) C, (h) O and (i) S elements.

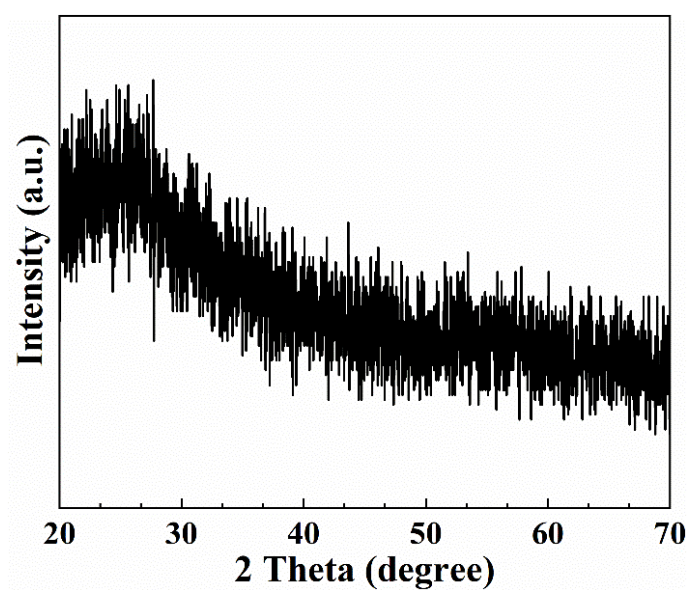

**Figure S3.** XRD pattern of Ru(III) PEDOT:PSS complexes film.

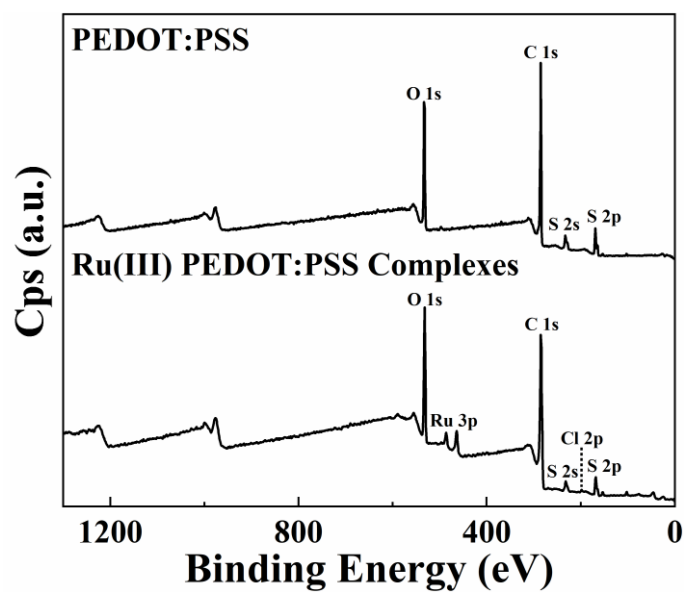

**Figure S4.** XPS survey spectra of PEDOT:PSS and Ru(III) PEDOT:PSS complexes films.

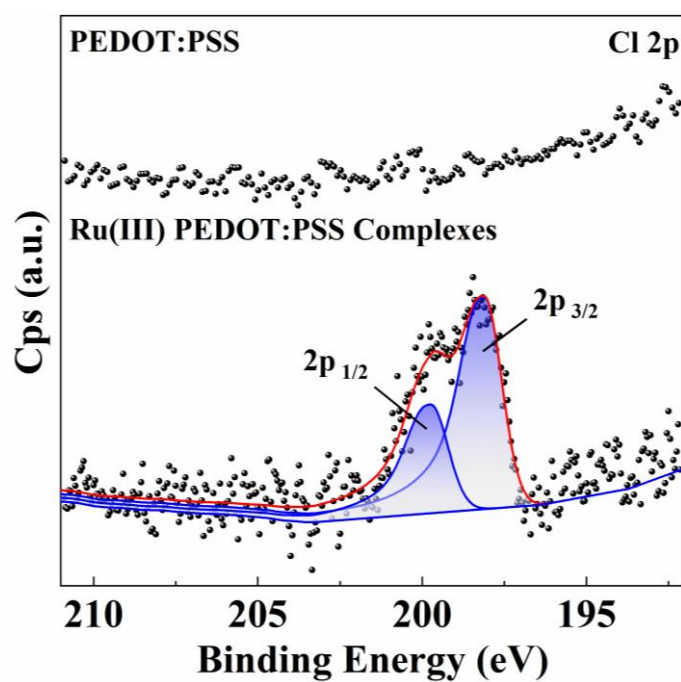

**Figure S5.** XPS Cl 2p spectra of PEDOT:PSS and Ru(III) PEDOT:PSS complexes films.



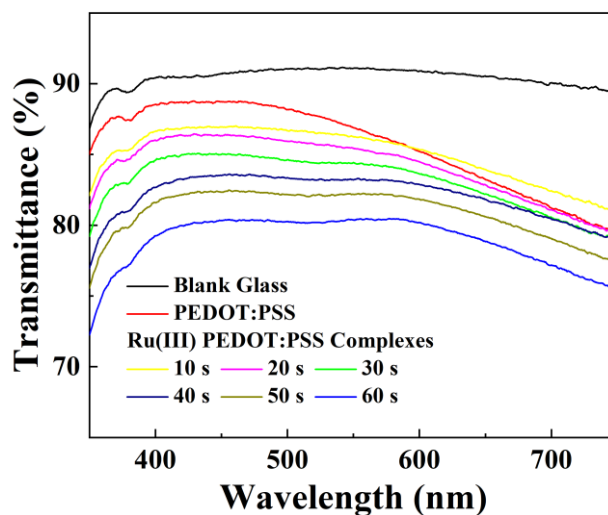

**Figure S6.** Transmittance spectra (350-750 nm) of the blank glass, PEDOT:PSS electrode and Ru(III) PEDOT:PSS complexes electrodes with different dipping time from 10 to 60 s, using air as the reference.

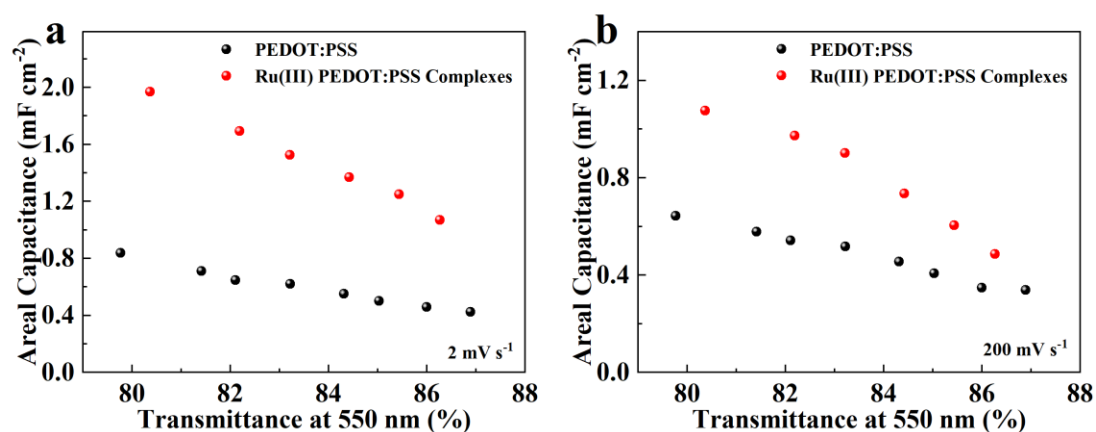

**Figure S7.** The plot of areal capacitance as a function of the electrode transmittance at 550 nm (using air as the reference). (a) Scan rate =  $2 \text{ mV s}^{-1}$ . (b) Scan rate =  $200 \text{ mV s}^{-1}$ .

**Table S1.** FTIR peak assignment corresponding to the PEDOT:PSS and Ru(III) PEDOT:PSS complexes .

| Peaks [ $\text{cm}^{-1}$ ] | Corresponding bonds                                           | Ref.      |
|----------------------------|---------------------------------------------------------------|-----------|
| 1551 and 1531              | Asymmetric C=C stretching within the thiophene ring, PEDOT    | [1, 2]    |
| 1415                       | Symmetric C=C stretching, PEDOT                               | [1]       |
| 1371                       | C–C stretching within the thiophene ring, PEDOT               | [1, 2]    |
| 1261 and 1130              | Symmetric C–O–C stretching, PEDOT                             | [1-3]     |
| 1057                       | Asymmetric C–O–C stretching, PEDOT                            | [2]       |
| 924                        | Deformation of the ethylenedioxy group in the molecule, PEDOT | [3]       |
| 943 and 856                | C–S stretching, PEDOT                                         | [2, 3]    |
| 1601, 1497, 1453           | Symmetric C=C stretching, PSS                                 | [2-4]     |
| 1159 and 1119              | Asymmetric $\text{SO}_3$ stretching, PSS                      | [1, 2, 4] |
| 1036 and 1009              | Symmetric $\text{SO}_3$ stretching, PSS                       | [2, 4]    |
| 776, 708, 676              | C–H out-of-plane deformation, PSS                             | [4]       |
| 618                        | Ring in-plane deformation, PSS                                | [4]       |

**Table S2.** Raman peak assignment corresponding to the PEDOT:PSS and Ru(III) PEDOT:PSS complexes.

| Peaks [cm <sup>-1</sup> ] | Corresponding bonds                                              | Ref.   |
|---------------------------|------------------------------------------------------------------|--------|
| 439                       |                                                                  | [5-7]  |
| 579 and 990               | oxyethylene ring deformation, PEDOT                              | [5-7]  |
| 704                       | symmetric C–S–C deformation, PEDOT                               | [5-7]  |
| 853                       | C–H bending, PEDOT                                               | [7]    |
| 1120                      | C–O–C deformation, PEDOT                                         | [5-7]  |
| 1258                      | C <sub>α</sub> –C <sub>α'</sub> inter-ring stretching, PEDOT     | [5-7]  |
| 1367                      | C <sub>β</sub> –C <sub>β</sub> stretching, PEDOT                 | [5-7]  |
| 1434 and 1449             | C <sub>α</sub> =C <sub>β</sub> symmetrical stretching, PEDOT     | [5-7]  |
| 1496                      | C <sub>α</sub> =C <sub>β</sub> asymmetrical stretching, PEDOT    | [5, 6] |
| 1567                      | C <sub>α</sub> =C <sub>β</sub> antisymmetrical stretching, PEDOT | [6, 7] |

**Table S3.** Energy density and power density of transparent supercapacitor devices in Figure 7f.

| Materials                           | Power Density             | Energy Density             | Ref.      |
|-------------------------------------|---------------------------|----------------------------|-----------|
|                                     | [ $\mu\text{W cm}^{-2}$ ] | [ $\mu\text{Wh cm}^{-2}$ ] |           |
| Ru(III) PEDOT:PSS complexes         | 2.60                      | 0.58                       | This work |
|                                     | 6.01                      | 0.53                       |           |
|                                     | 11.33                     | 0.50                       |           |
|                                     | 21.21                     | 0.47                       |           |
|                                     | 47.82                     | 0.43                       |           |
|                                     | 86.83                     | 0.39                       |           |
|                                     | 151.35                    | 0.34                       |           |
| PEDOT:PSS                           | 1.02                      | 0.226                      | This work |
|                                     | 2.44                      | 0.217                      |           |
|                                     | 4.80                      | 0.213                      |           |
|                                     | 9.38                      | 0.208                      |           |
|                                     | 22.81                     | 0.203                      |           |
|                                     | 44.72                     | 0.199                      |           |
|                                     | 84.65                     | 0.188                      |           |
| RuO <sub>2</sub> /PEDOT:PSS         | 8.27                      | 0.053                      | [8]       |
|                                     | 16.14                     | 0.052                      |           |
|                                     | 30.88                     | 0.051                      |           |
|                                     | 66.01                     | 0.045                      |           |
|                                     | 108.68                    | 0.037                      |           |
|                                     | 136.66                    | 0.030                      |           |
|                                     | 151.31                    | 0.026                      |           |
| Ni <sub>3</sub> (HITP) <sub>2</sub> | 1.35                      | 0.12                       | [9]       |
|                                     | 2.33                      | 0.12                       |           |
|                                     | 4.65                      | 0.12                       |           |
|                                     | 9.34                      | 0.11                       |           |



|                                                     |        |         |      |
|-----------------------------------------------------|--------|---------|------|
|                                                     | 13.98  | 0.11    |      |
|                                                     | 23.46  | 0.11    |      |
|                                                     | 32.84  | 0.11    |      |
|                                                     | 46.71  | 0.10    |      |
|                                                     | 69.39  | 0.09    |      |
| Cu <sub>3</sub> (HHTP) <sub>2</sub>                 | 4.5    | 0.088   | [10] |
|                                                     | 9.3    | 0.084   |      |
|                                                     | 14.1   | 0.081   |      |
|                                                     | 23.3   | 0.077   |      |
|                                                     | 32.9   | 0.073   |      |
|                                                     | 46.6   | 0.068   |      |
|                                                     | 70.2   | 0.066   |      |
|                                                     | 93.1   | 0.060   |      |
| Covalent Organic Frameworks                         | 0.75   | 0.027   | [11] |
|                                                     | 1.32   | 0.027   |      |
|                                                     | 1.95   | 0.026   |      |
|                                                     | 2.65   | 0.025   |      |
|                                                     | 3.96   | 0.023   |      |
|                                                     | 5.25   | 0.022   |      |
|                                                     | 7.95   | 0.020   |      |
|                                                     | 13.13  | 0.016   |      |
|                                                     | 18.02  | 0.011   |      |
|                                                     | 24.42  | 0.009   |      |
| Ti <sub>3</sub> C <sub>2</sub> T <sub>x</sub> MXene | 0.5682 | 0.00947 | [12] |
|                                                     | 1.1244 | 0.00937 |      |
|                                                     | 2.733  | 0.00911 |      |
|                                                     | 5.244  | 0.00874 |      |
|                                                     | 9.792  | 0.00816 |      |

---

## References

- 1 S. Funda, T. Ohki, Q. Liu, J. Hossain, Y. Ishimaru, K. Ueno, H. Shirai, *J. Appl. Phys.* 2016, **120**, 033103.
- 2 F. Ely, A. Matsumoto, B. Zoetebier, V. S. Peressinotto, M. K. Hirata, D. A. de Sousa, R. Maciel, *Org. Electron.* 2014, **15**, 1062.
- 3 L. Chen, C. Yuan, H. Dou, B. Gao, S. Chen, X. Zhang, *Electrochim. Acta* 2009, **54**, 2335.
- 4 D. Alemu, H.-Y. Wei, K.-C. Ho, C.-W. Chu, *Energy Environ. Sci.* 2012, **5**, 9662.
- 5 S. Garreau, G. Louarn, J. P. Buisson, G. Froyer, S. Lefrant, *Macromolecules* 1999, **32**, 6807.
- 6 S. Cho, M. Kim, J. Jang, *ACS Appl. Mater. Interfaces* 2015, **7**, 10213.
- 7 S. Nešpůrek, P. Kuberský, R. Polanský, M. Trchová, J. Šebera, V. Sychrovský, *Phys. Chem. Chem. Phys.* 2022, **24**, 541.
- 8 C. Zhang, T. M. Higgins, S.-H. Park, S. E. O'Brien, D. Long, J. N. Coleman, V. Nicolosi, *Nano Energy* 2016, **28**, 495.
- 9 W. Zhao, T. Chen, W. Wang, B. Jin, J. Peng, S. Bi, M. Jiang, S. Liu, Q. Zhao, W. Huang, *Sci. Bull.* 2020, **65**, 1803.
- 10 W. Zhao, T. Chen, W. Wang, S. Bi, M. Jiang, K. Y. Zhang, S. Liu, W. Huang, Q. Zhao, *Adv. Mater. Interfaces* 2021, **8**, 2100308.
- 11 W. Wang, W. Zhao, T. Chen, Y. Bai, H. Xu, M. Jiang, S. Liu, W. Huang, Q. Zhao, *Adv. Funct. Mater.* 2021, **31**, 2010306.
- 12 T. Guo, D. Zhou, S. Deng, M. Jafarpour, J. Avaro, A. Neels, J. Heier, C. Zhang, *ACS Nano* 2023, **17**, 3737.
